# Supplementary material for: Development of LPS antagonistic therapeutics: synthesis and evaluation of glucopyranoside-spacer-amino acid motifs
Source: Royal Society of Chemistry journal article supplement (doi:10.1039/c1ra00145k), 2011-01-01
Supplement: c1ra00145k.pdf [file c1ra00145k.pdf]

## **Supporting Information**

### **Development of LPS Antagonistic Therapeutics: Synthesis and Evaluation of Glucopyranoside-Spacer-Amino Acid Motifs**

Sophon Kaothip, Geeta Paranjape, Shana E. Terrill, Aileen F. G. Bongat, Maria L. D. Udan, Teerada Kamkhachorn, Hope L. Johnson, Michael R. Nichols,\* and Alexei V. Demchenko\*

*Department of Chemistry and Biochemistry, University of Missouri – St. Louis, One University Boulevard, St. Louis, MO 63121, USA*

#### **Contents:**

|                                   |      |
|-----------------------------------|------|
| NMR spectra of compound <b>8</b>  | S-2  |
| NMR spectra of compound <b>10</b> | S-4  |
| NMR spectra of compound <b>11</b> | S-6  |
| NMR spectra of compound <b>12</b> | S-8  |
| NMR spectra of compound <b>13</b> | S-10 |
| NMR spectra of compound <b>15</b> | S-12 |
| NMR spectra of compound <b>16</b> | S-14 |
| NMR spectra of compound <b>17</b> | S-16 |
| NMR spectra of compound <b>18</b> | S-18 |
| NMR spectra of compound <b>19</b> | S-20 |
| NMR spectra of compound <b>22</b> | S-22 |
| NMR spectra of compound <b>23</b> | S-24 |
| NMR spectra of compound <b>24</b> | S-26 |

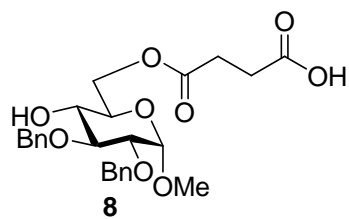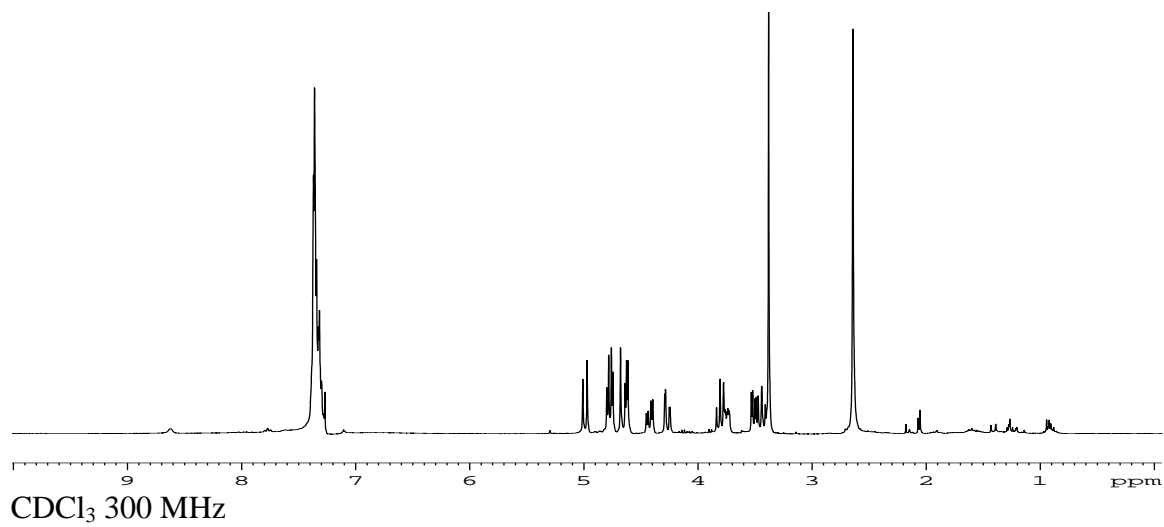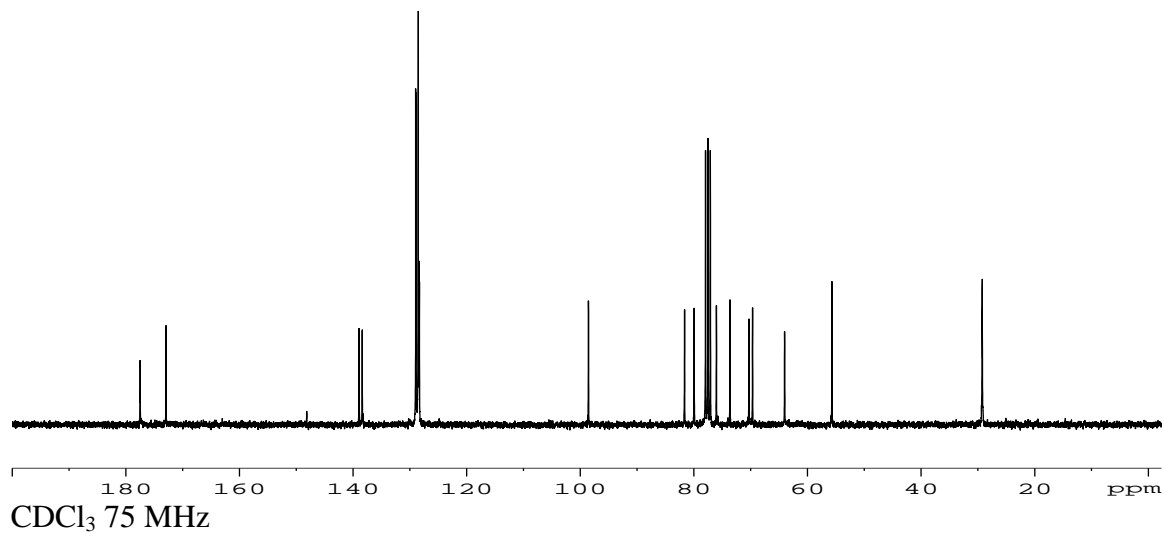

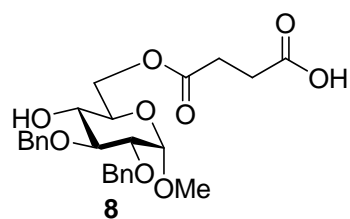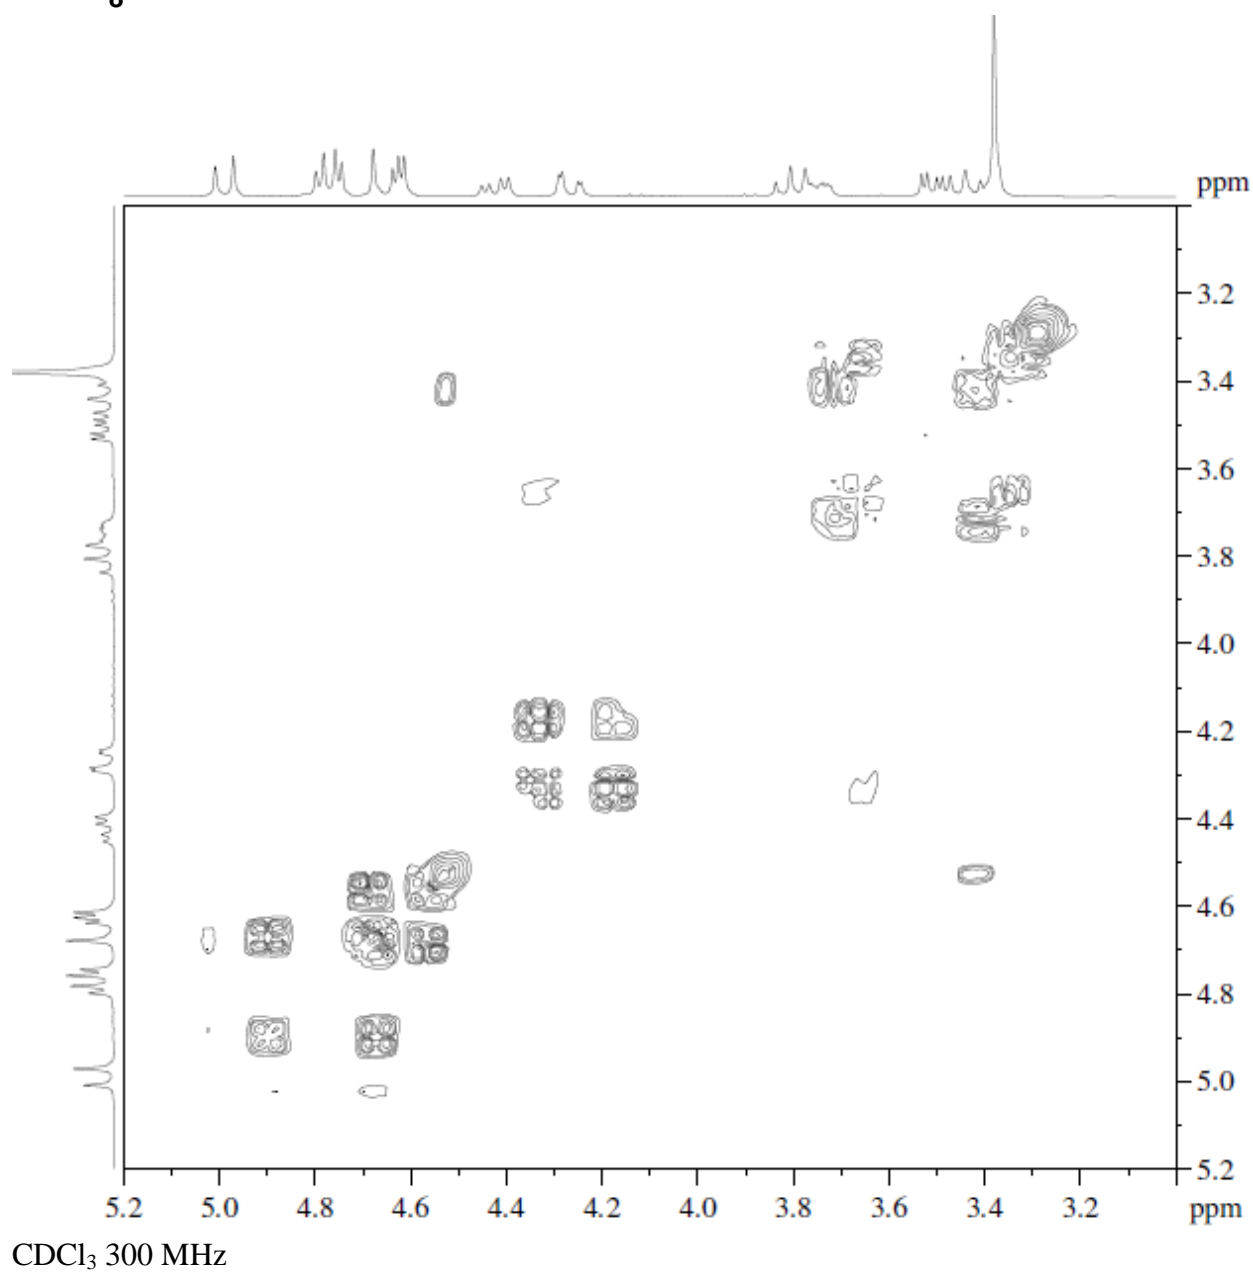

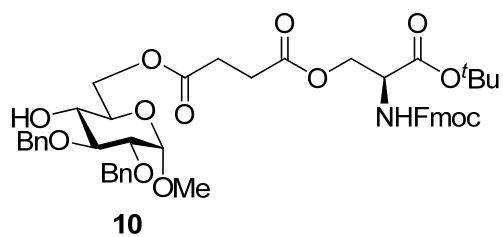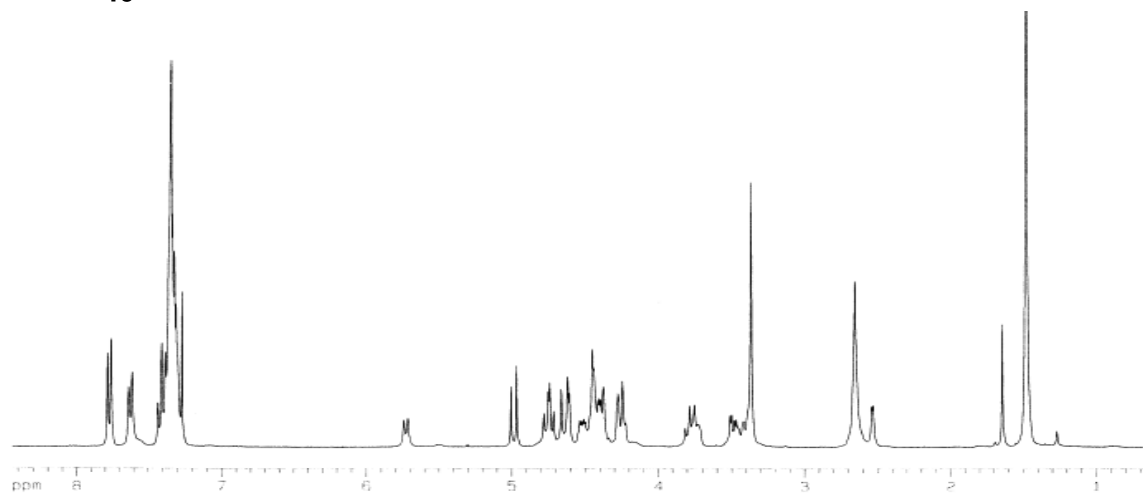

CDCl<sub>3</sub> 300 MHz

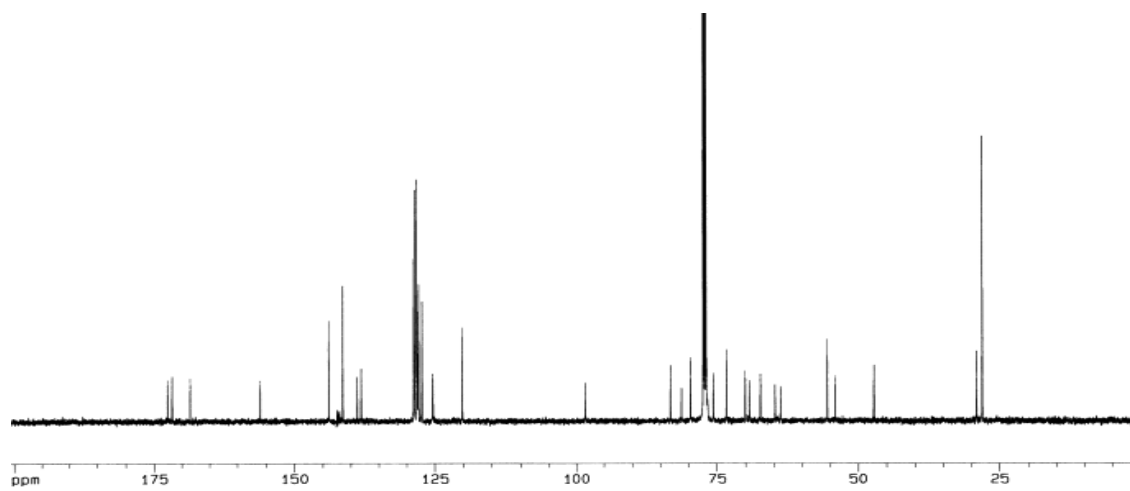

CDCl<sub>3</sub> 125 MHz

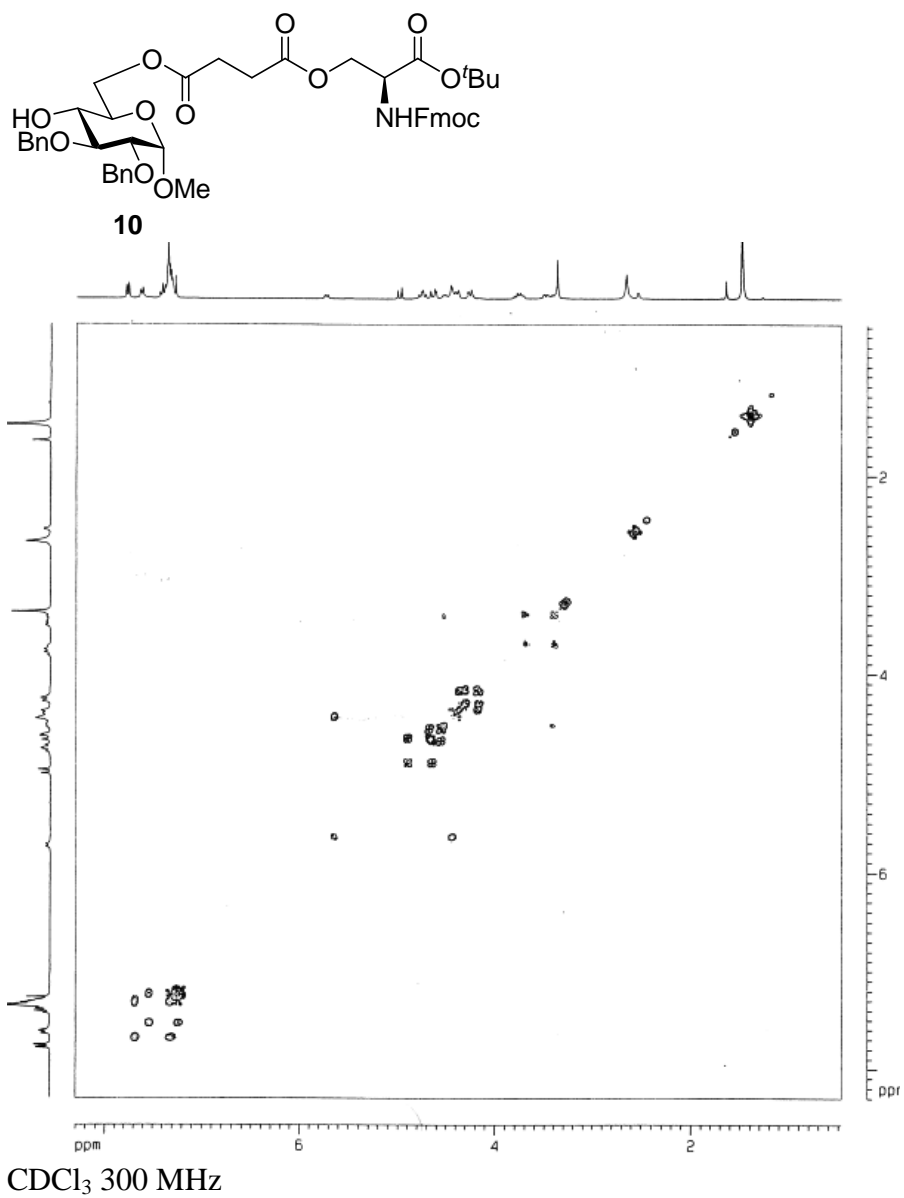

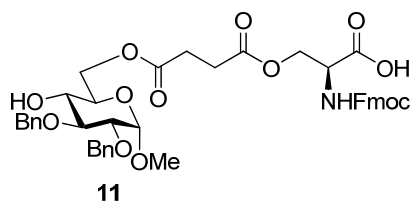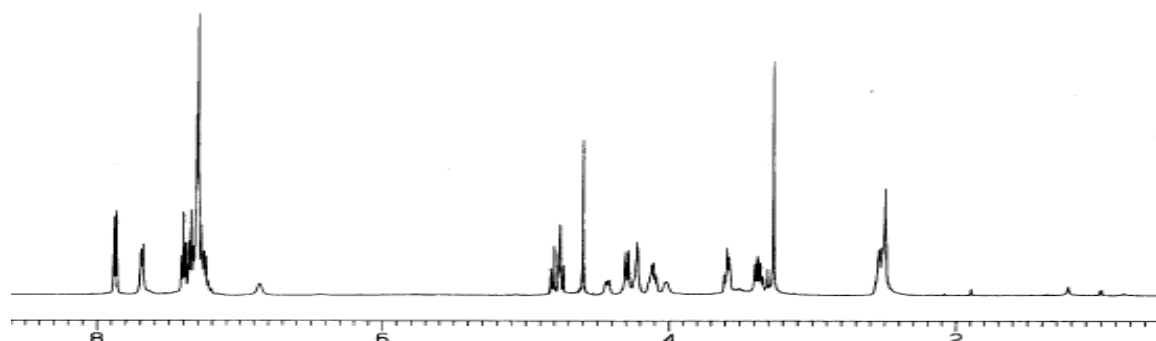

$\text{CDCl}_3:(\text{CD}_3)_2\text{SO}$  (4:2) 500 MHz

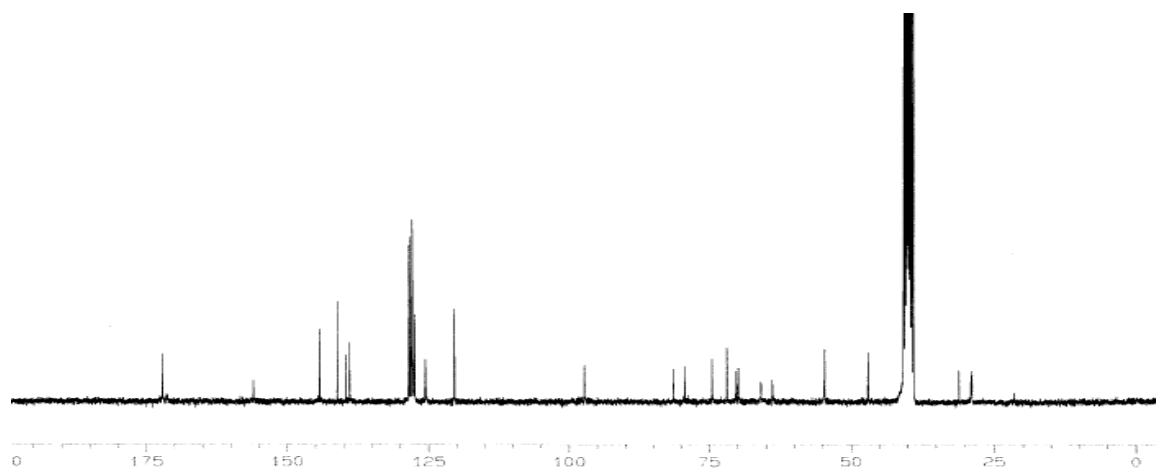

$\text{CDCl}_3:(\text{CD}_3)_2\text{SO}$  (4:2) 75 MHz

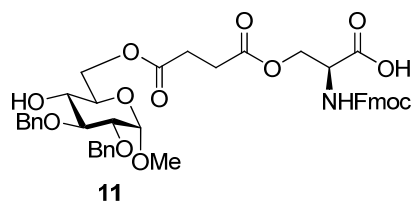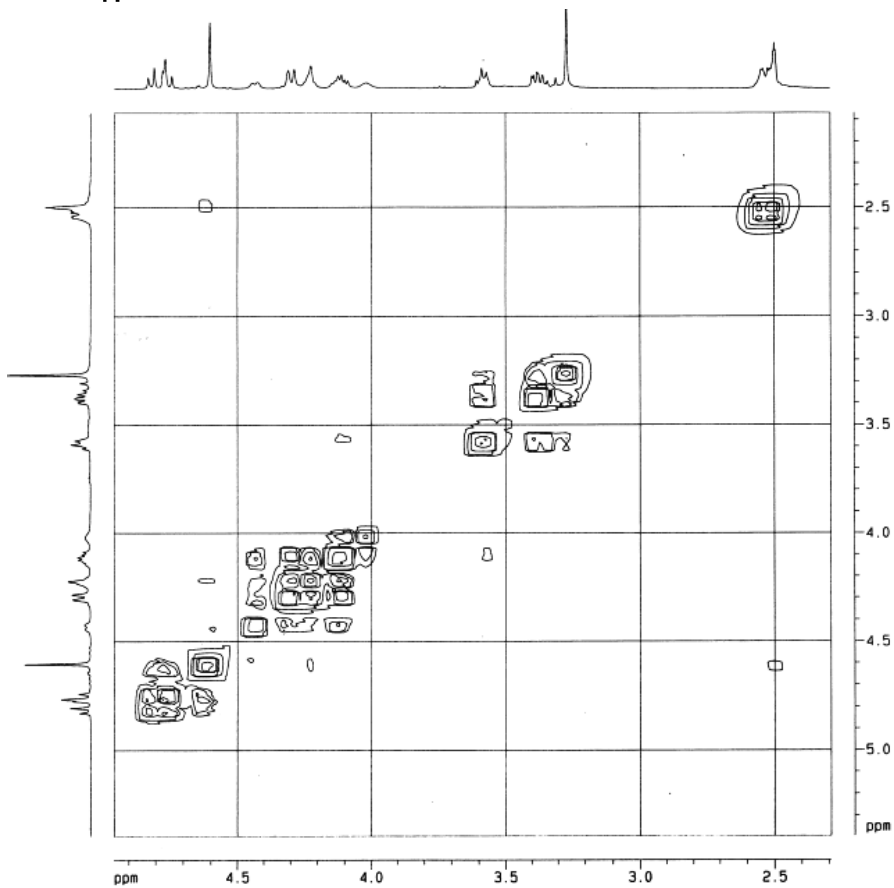

$\text{CDCl}_3:(\text{CD}_3)_2\text{SO}$  (4:2) 500 MHz

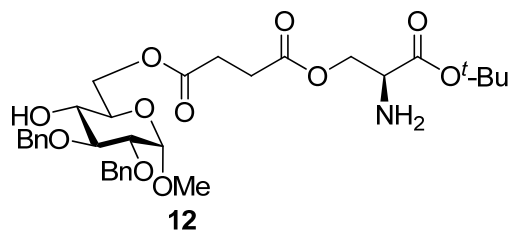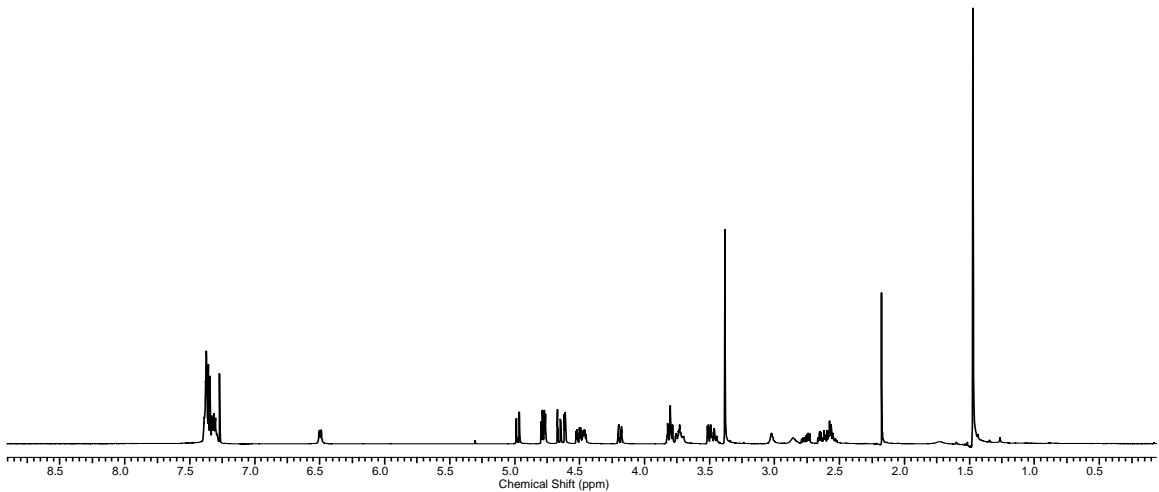

CDCl<sub>3</sub> 500 MHz

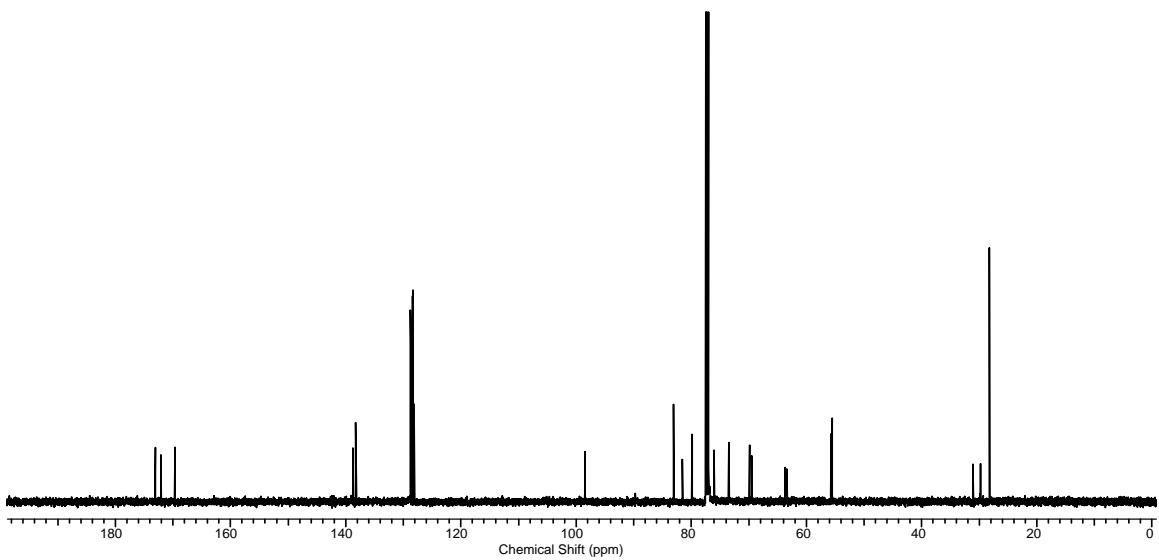

CDCl<sub>3</sub> 125 MHz



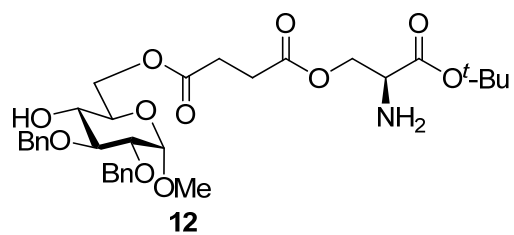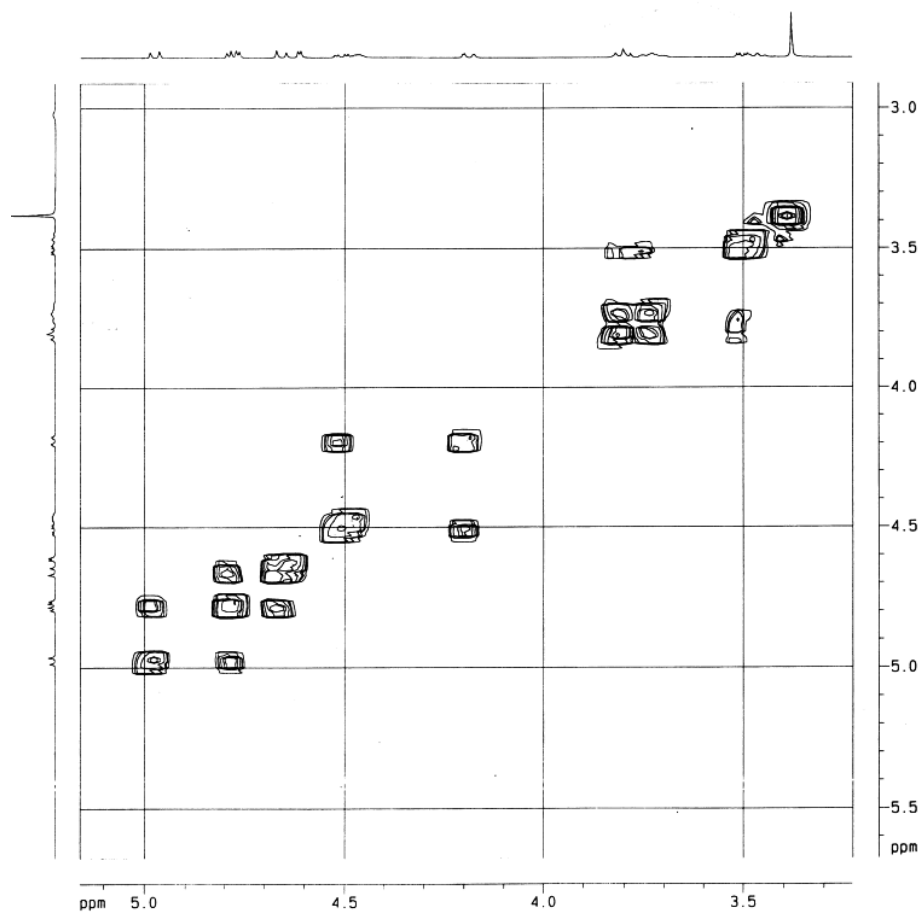

$\text{CDCl}_3$  500 MHz

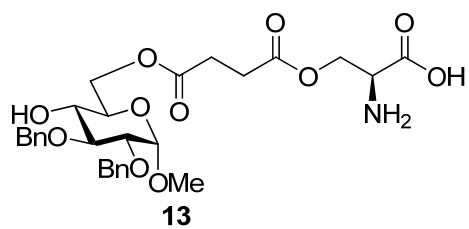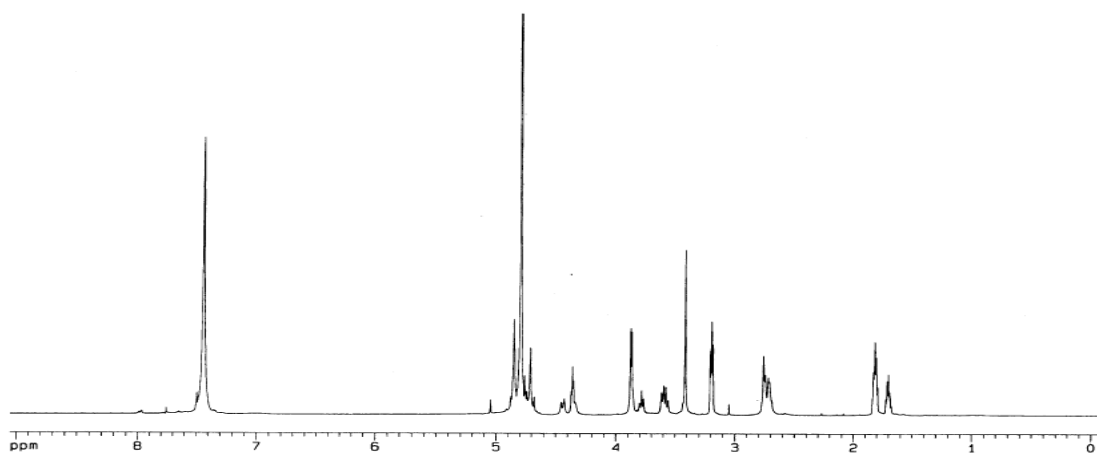

D<sub>2</sub>O 500 MHz

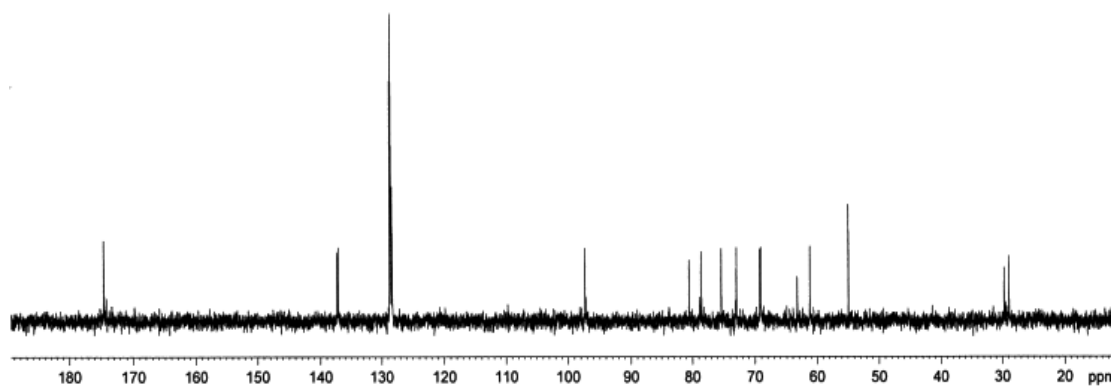

D<sub>2</sub>O 75 MHz

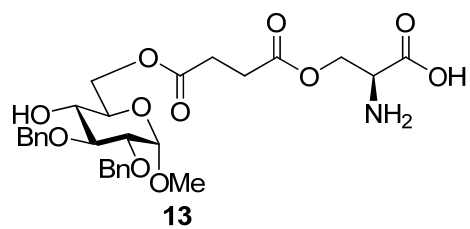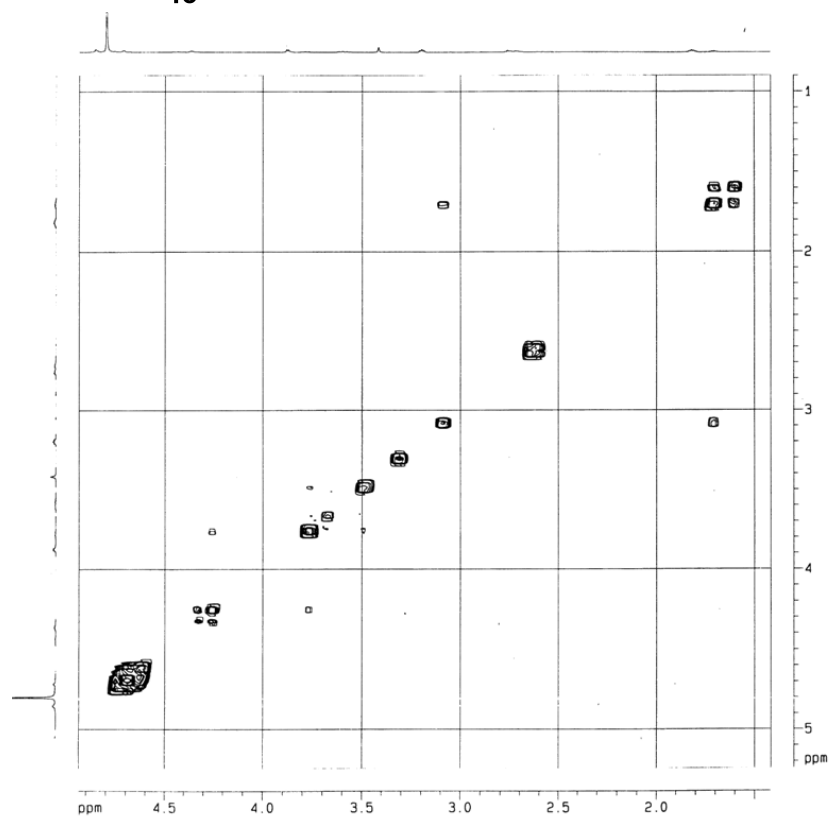

D<sub>2</sub>O 500 MHz

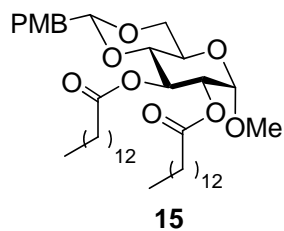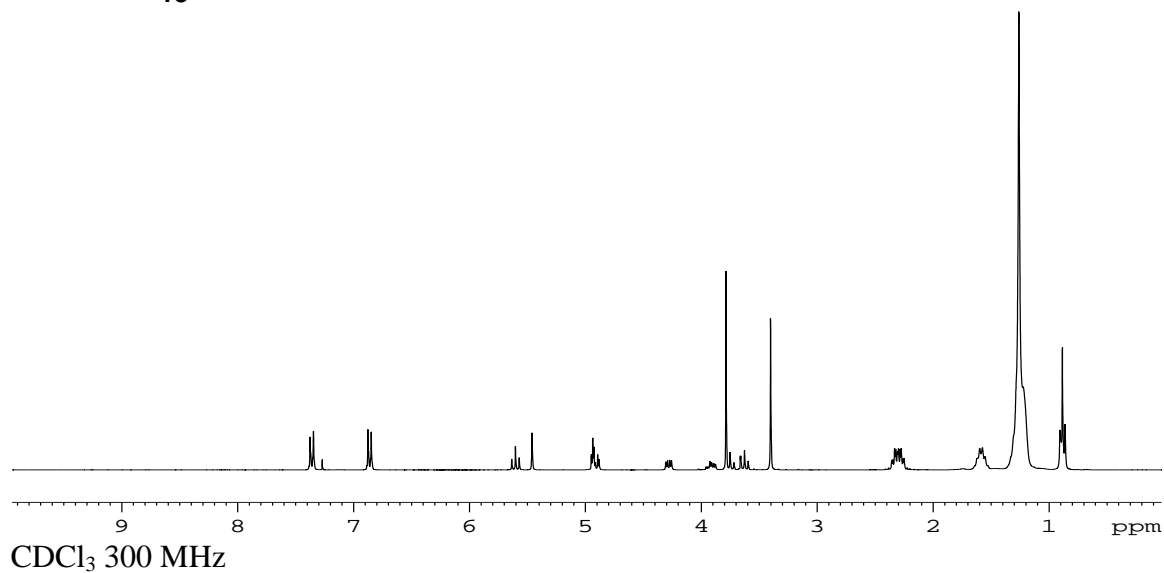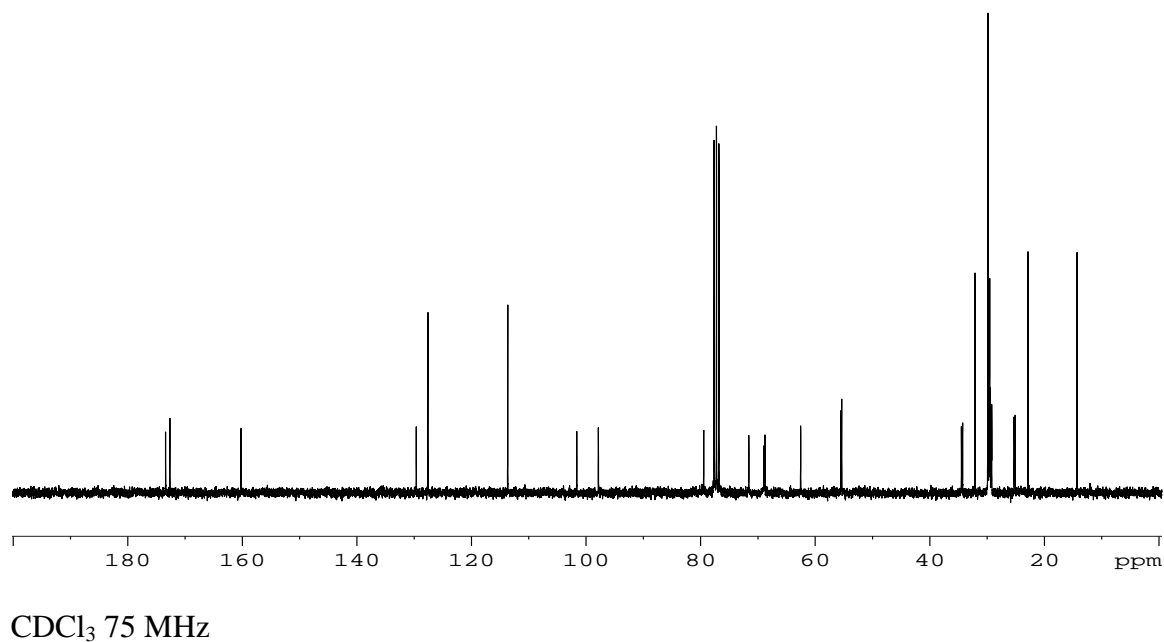

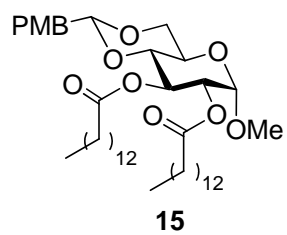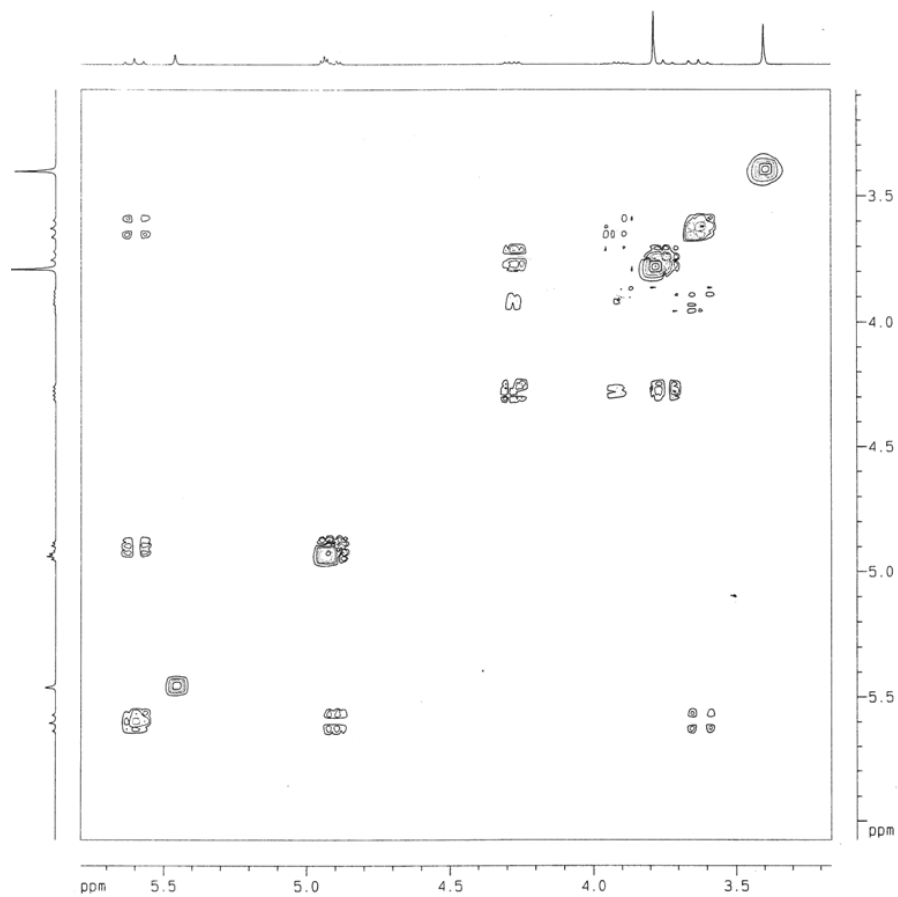

$\text{CDCl}_3$  300 MHz

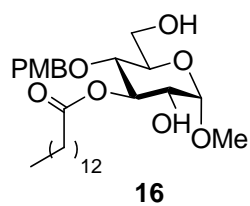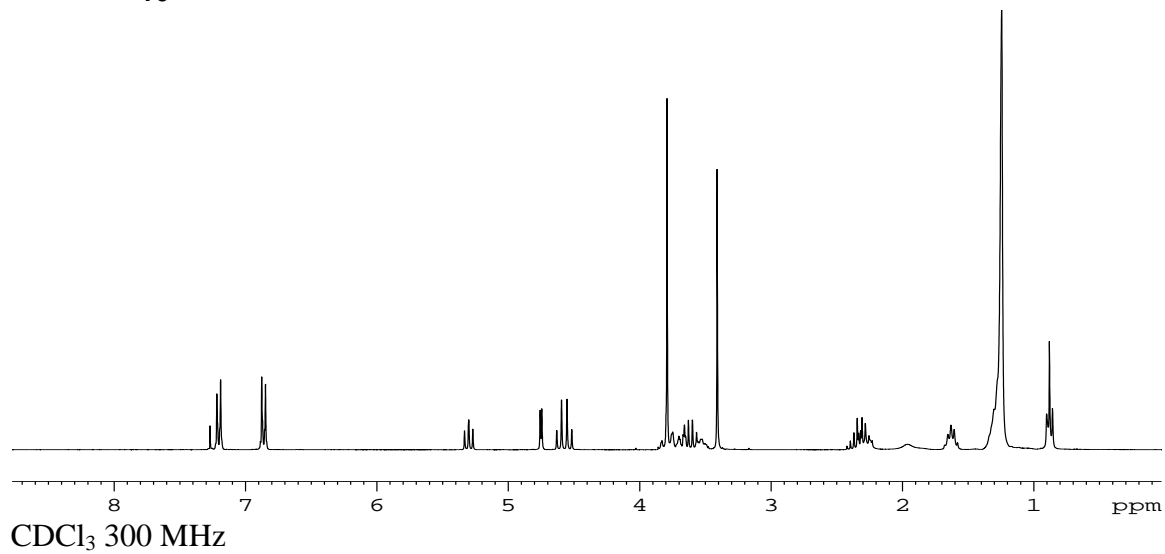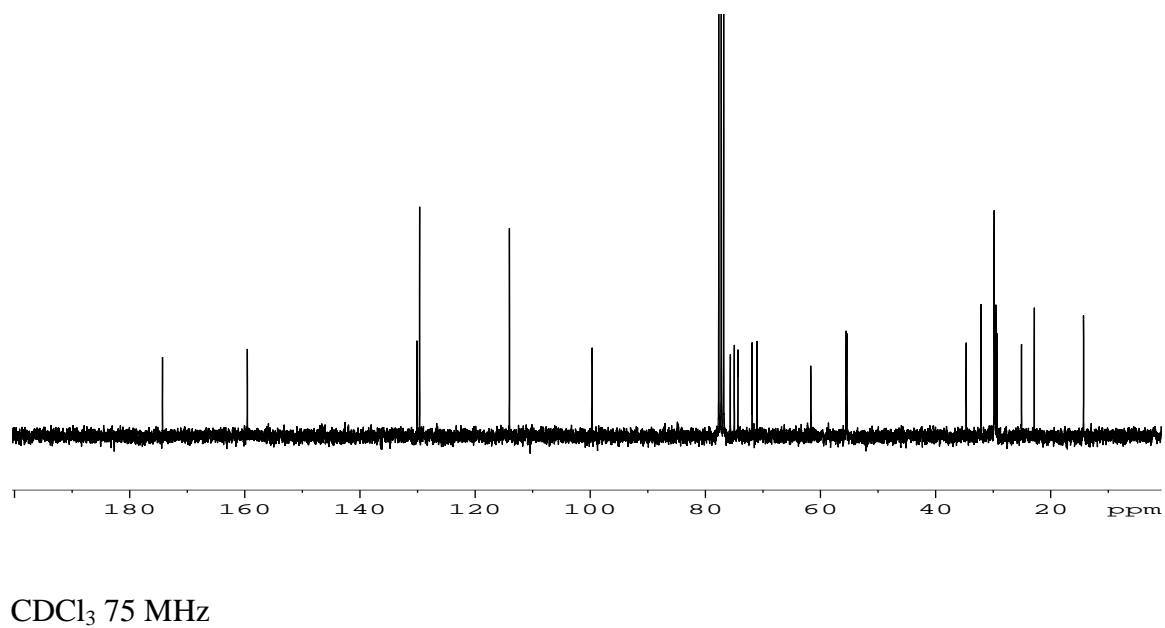

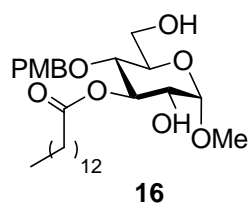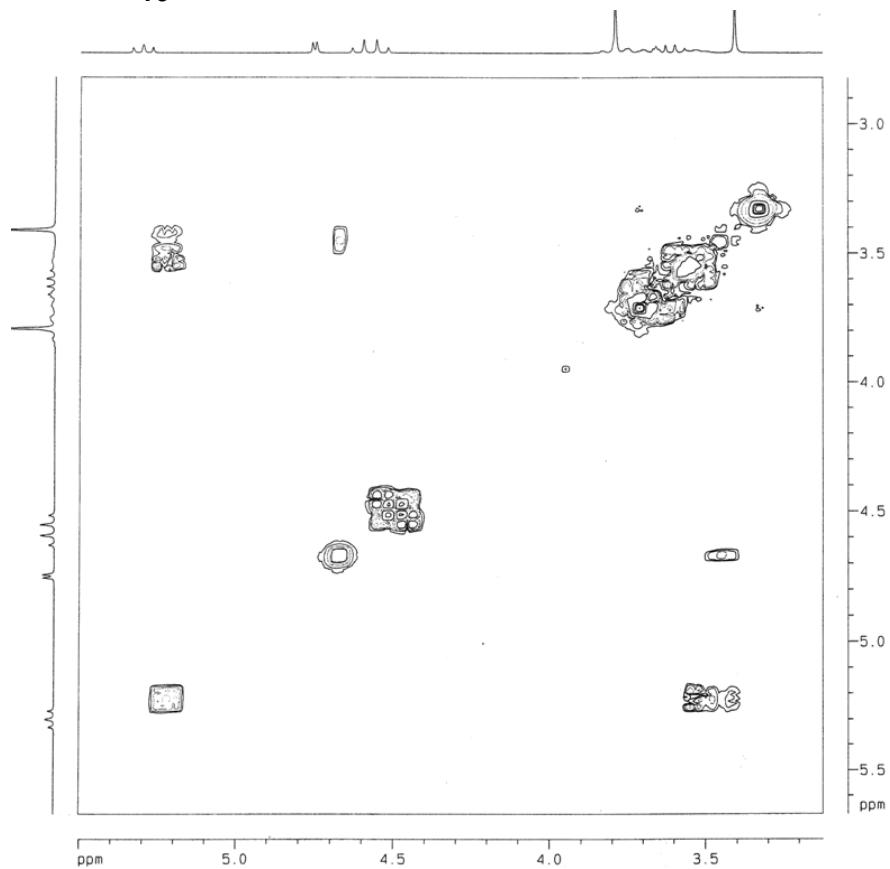

$\text{CDCl}_3$  300 MHz

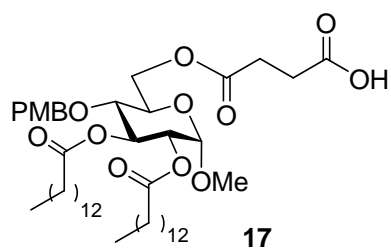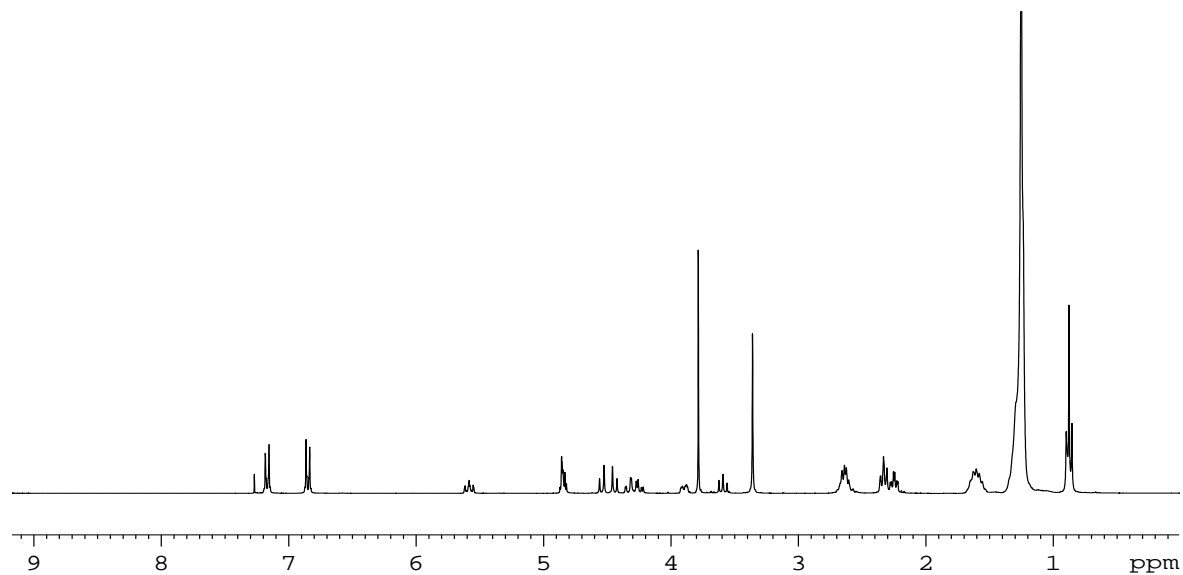

CDCl<sub>3</sub> 300 MHz

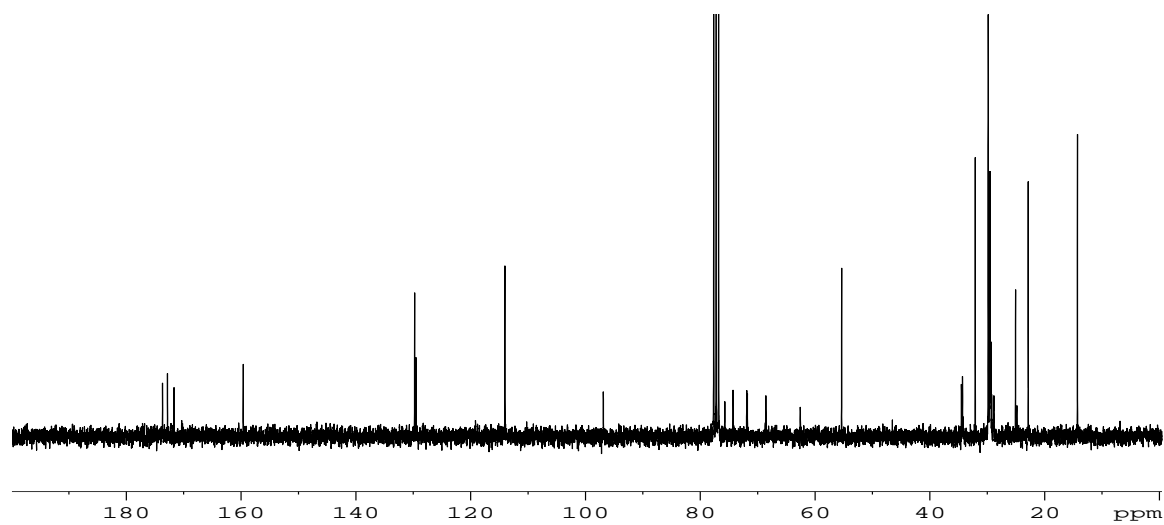

CDCl<sub>3</sub> 75 MHz



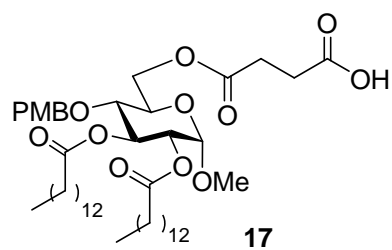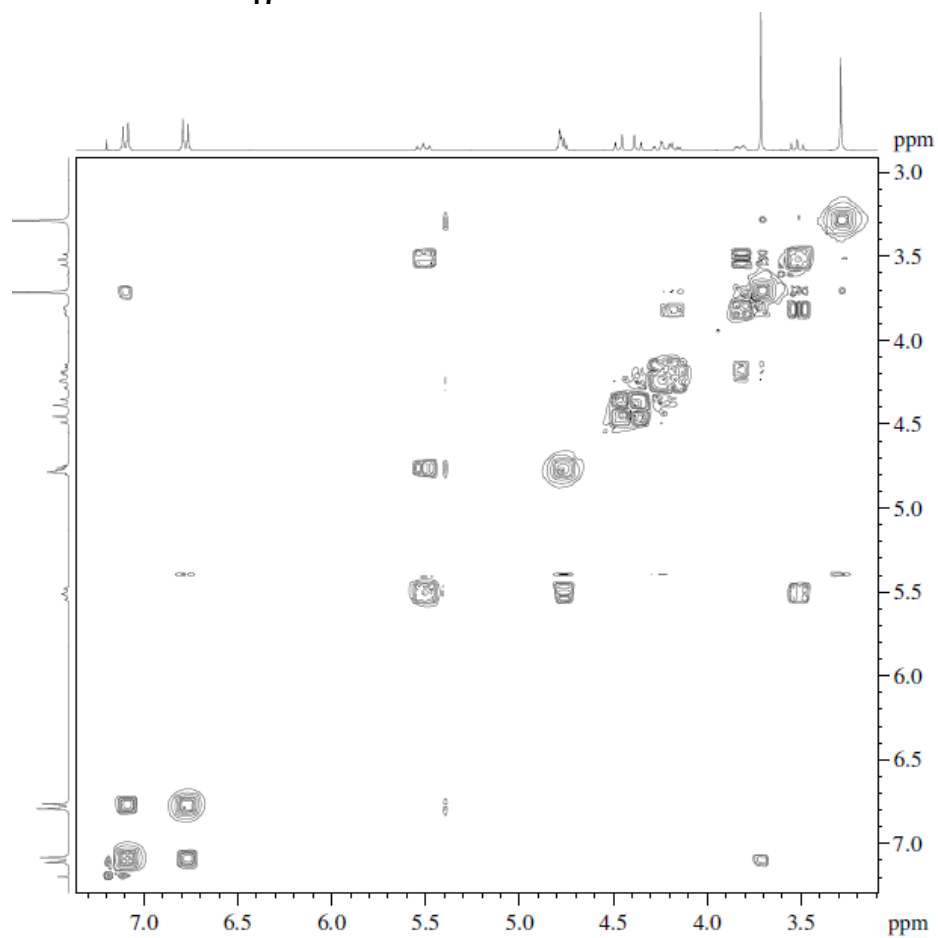

$\text{CDCl}_3$  300 MHz

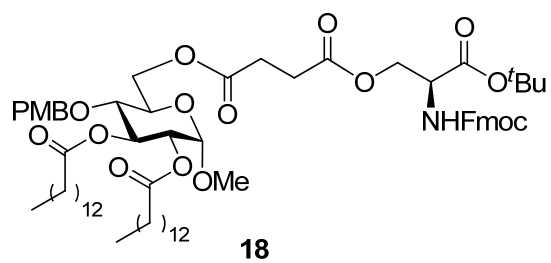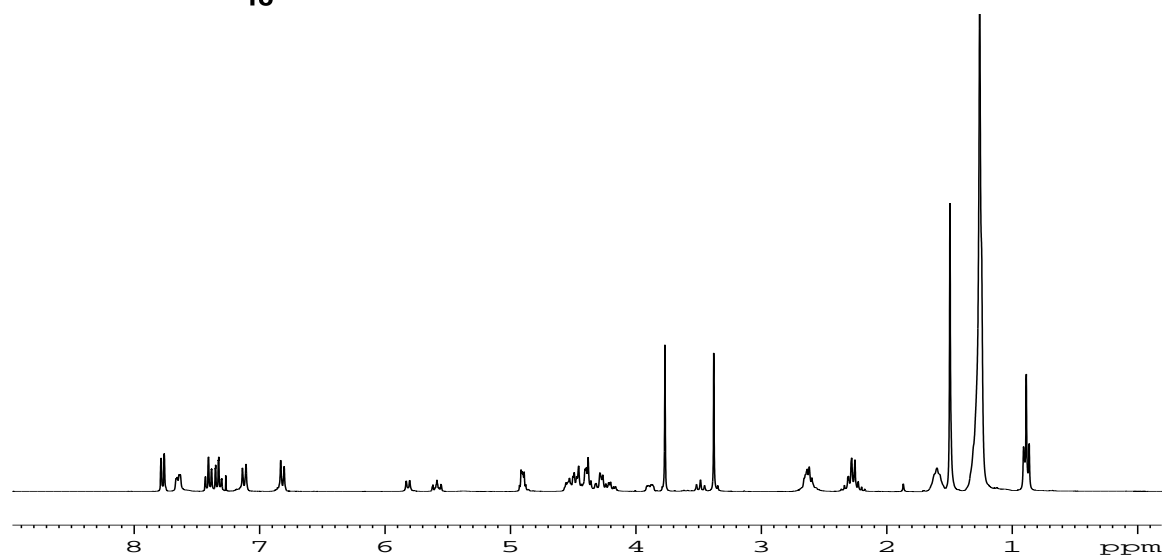

CDCl<sub>3</sub> 300 MHz

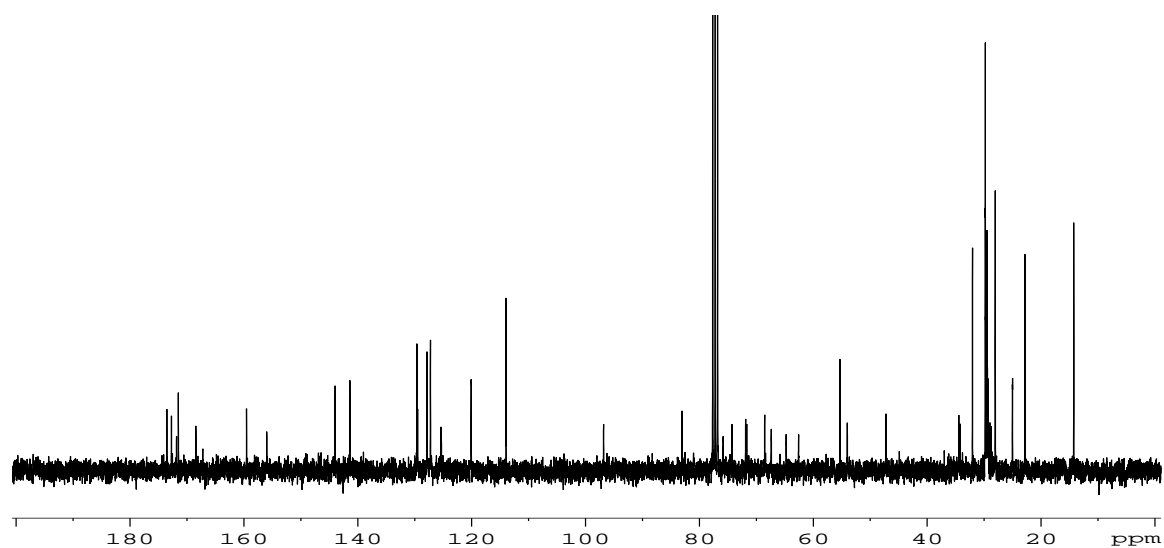

CDCl<sub>3</sub> 75 MHz

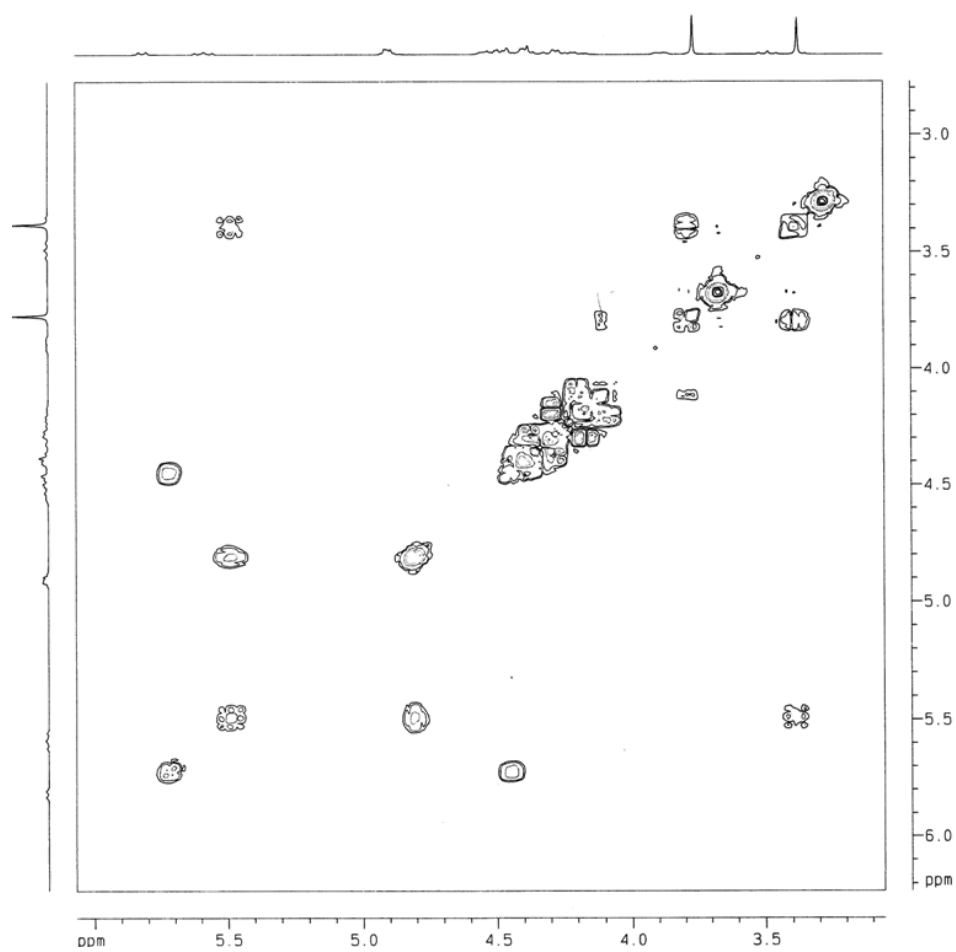

$\text{CDCl}_3$  300 MHz

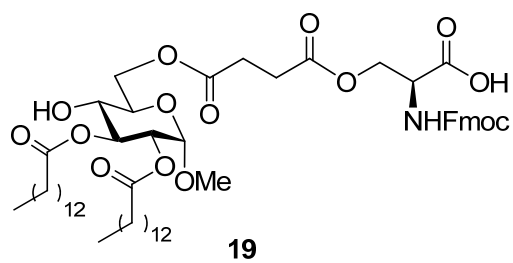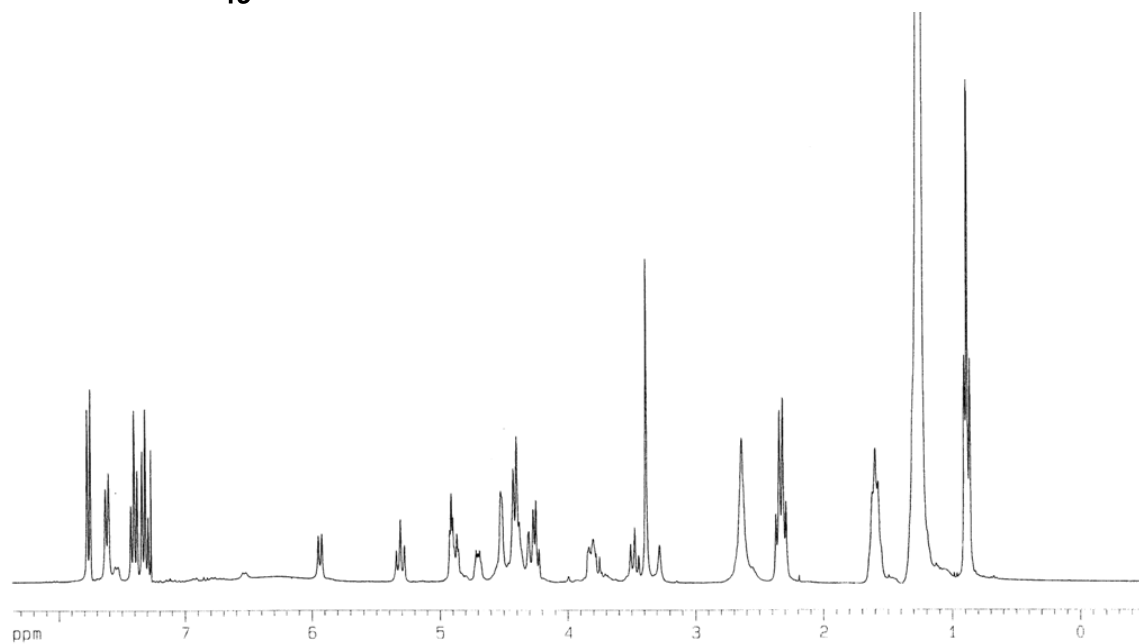

CDCl<sub>3</sub> 300 MHz

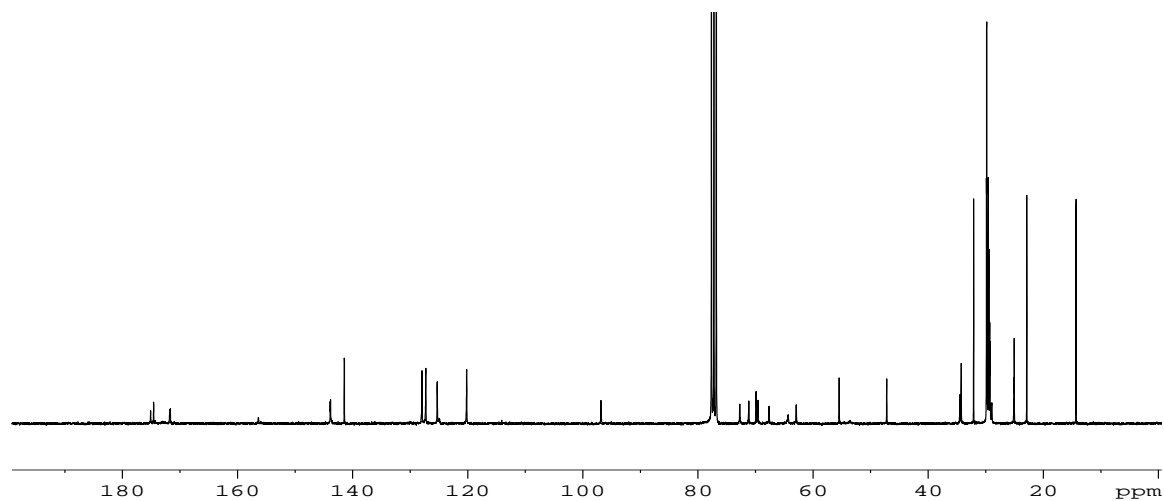

CDCl<sub>3</sub> 75 MHz

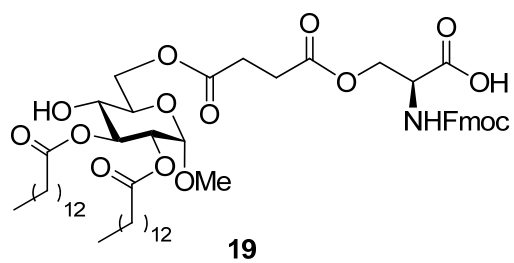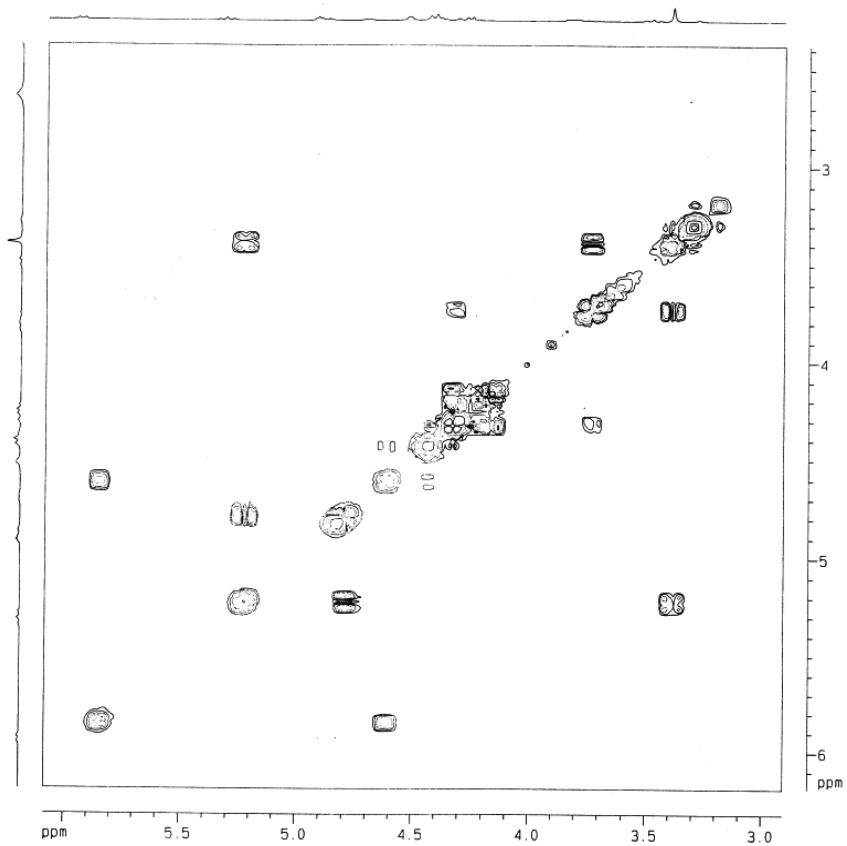

CDCl<sub>3</sub> 300 MHz

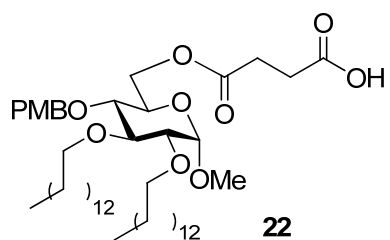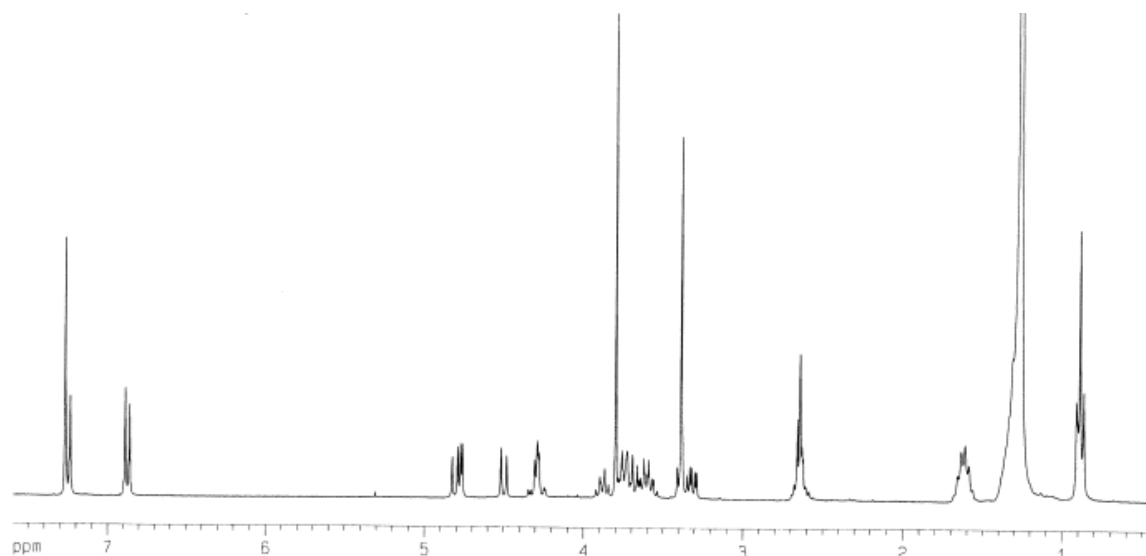

CDCl<sub>3</sub> 300 MHz

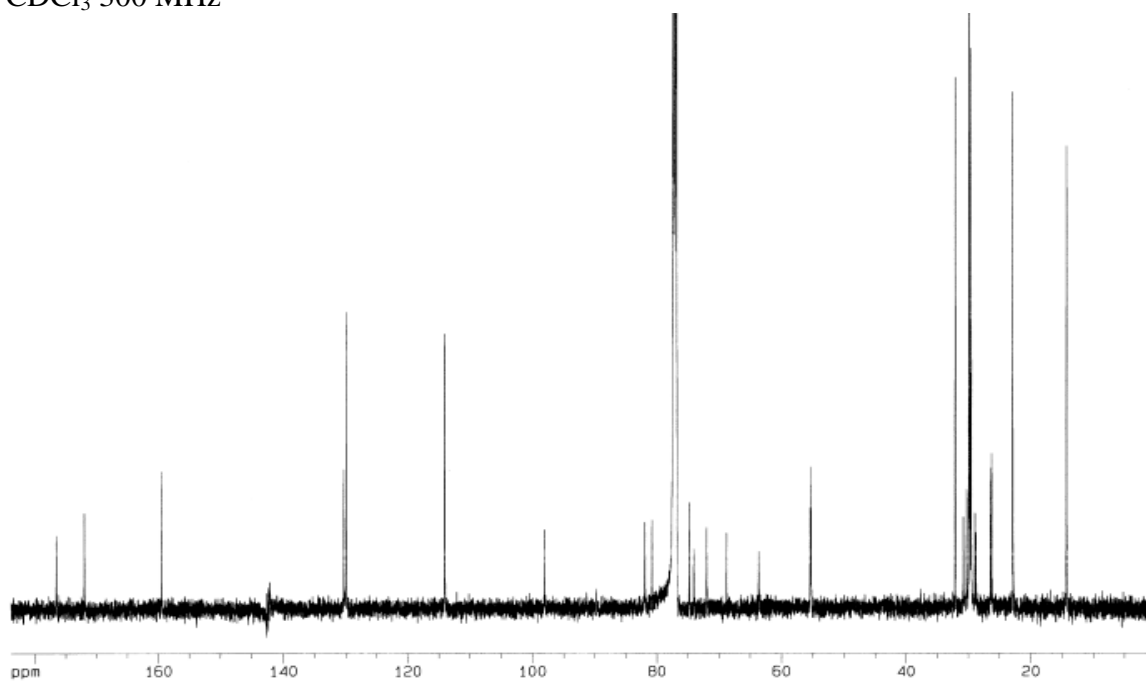

CDCl<sub>3</sub> 125 MHz

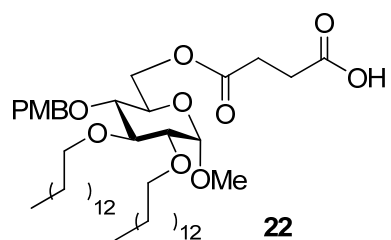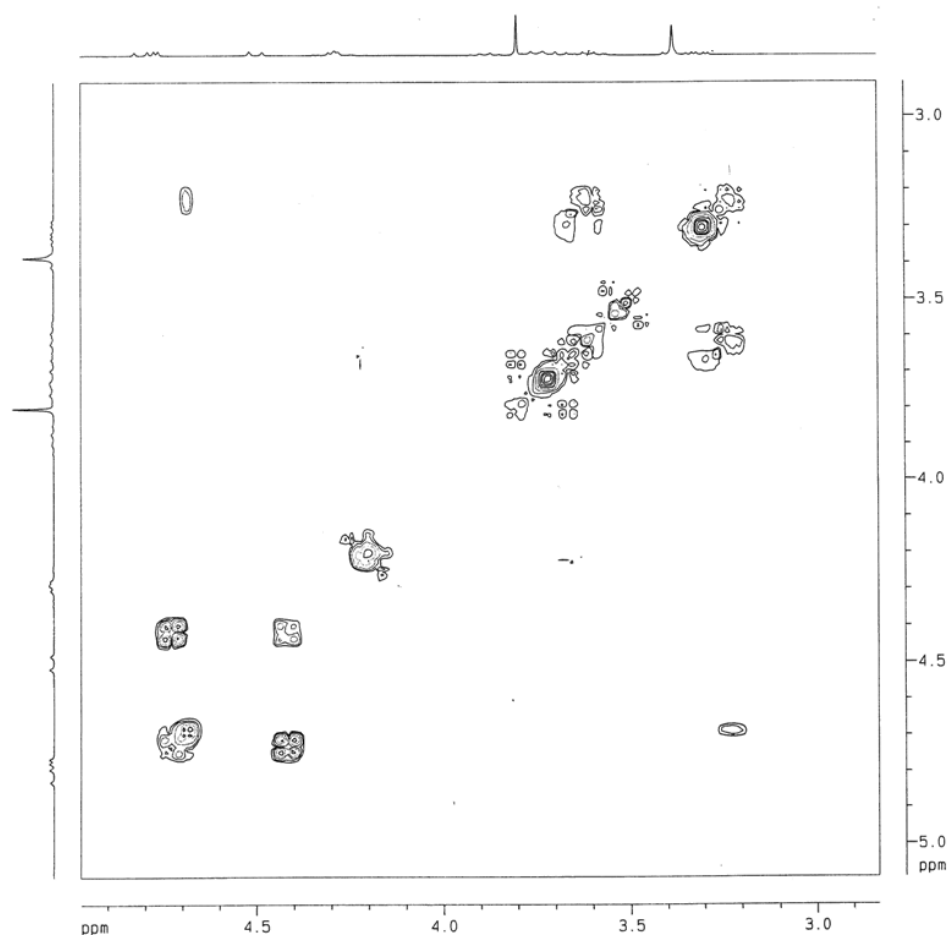

$\text{CDCl}_3$  300 MHz

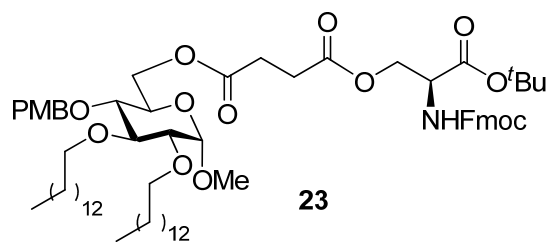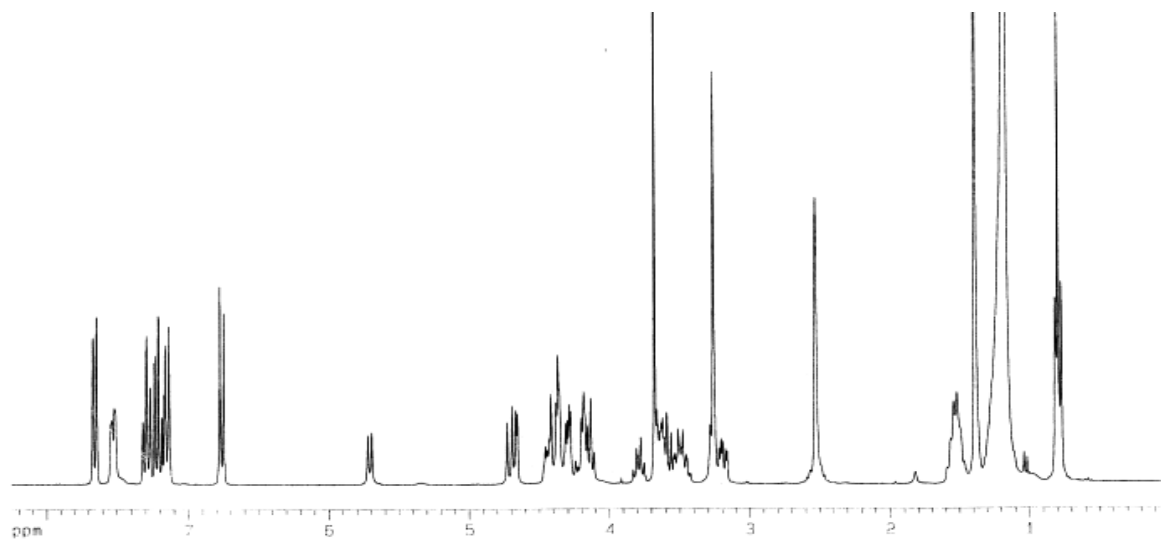

CDCl<sub>3</sub> 300 MHz

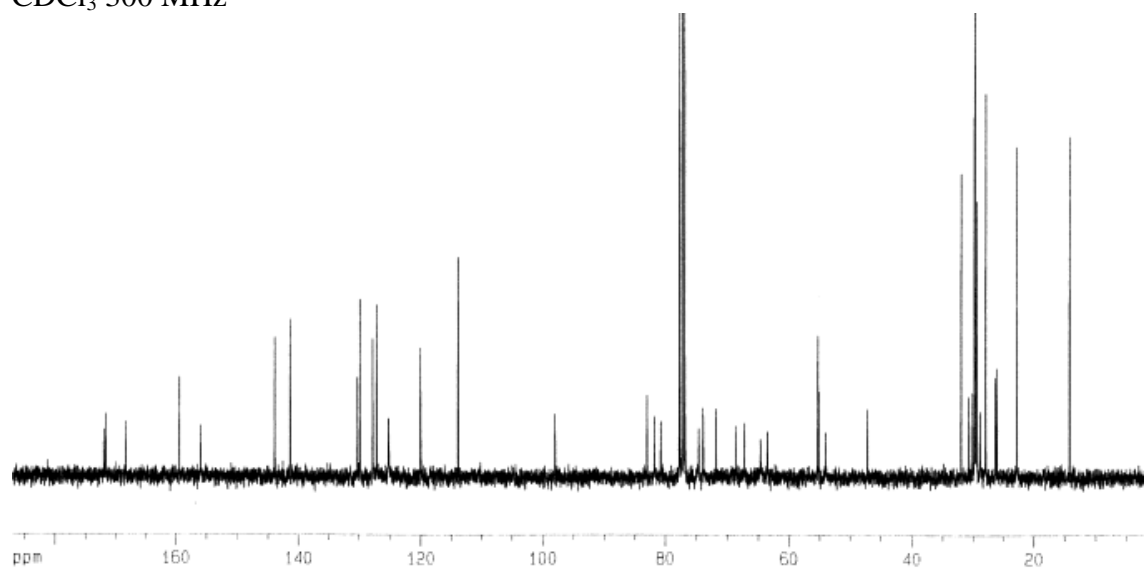

CDCl<sub>3</sub> 75 MHz



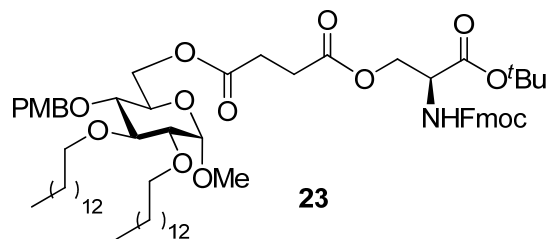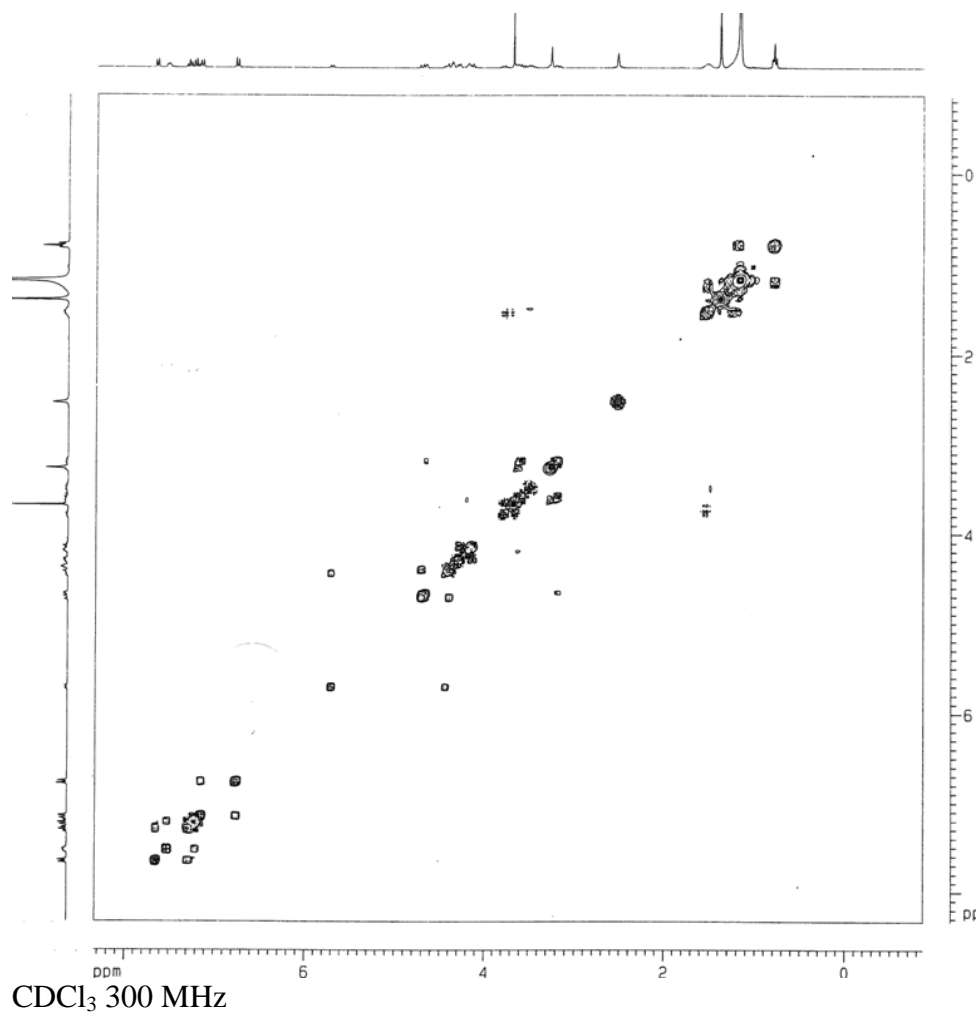

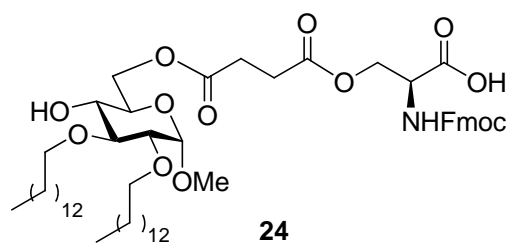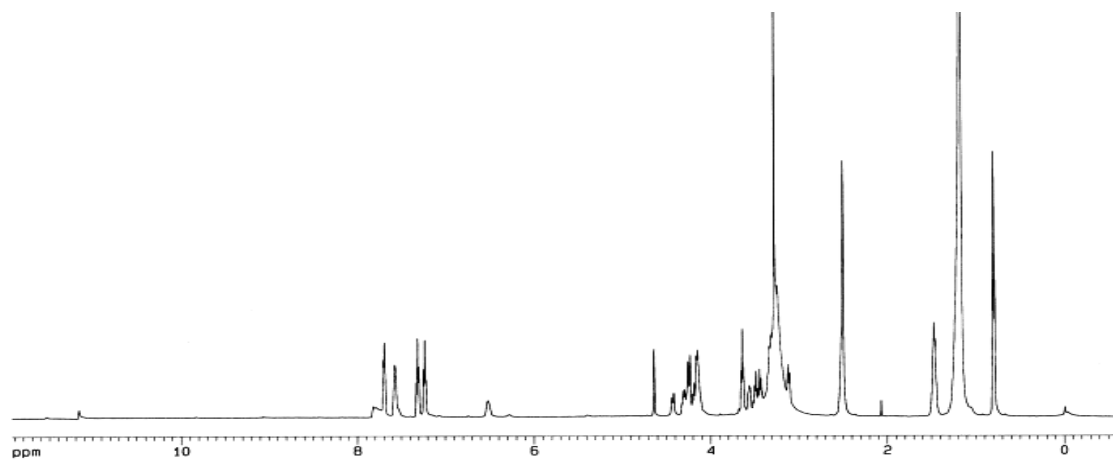

$\text{CDCl}_3:(\text{CD}_3)_2\text{SO}$  (4:2) 500 MHz

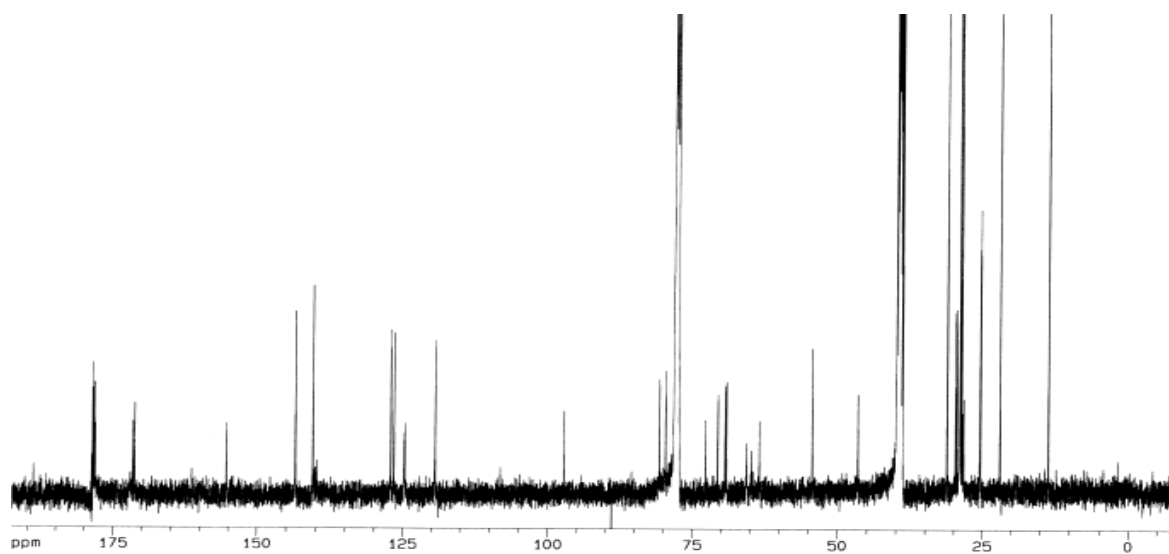

$\text{CDCl}_3:(\text{CD}_3)_2\text{SO}$  (4:2) 125 MHz

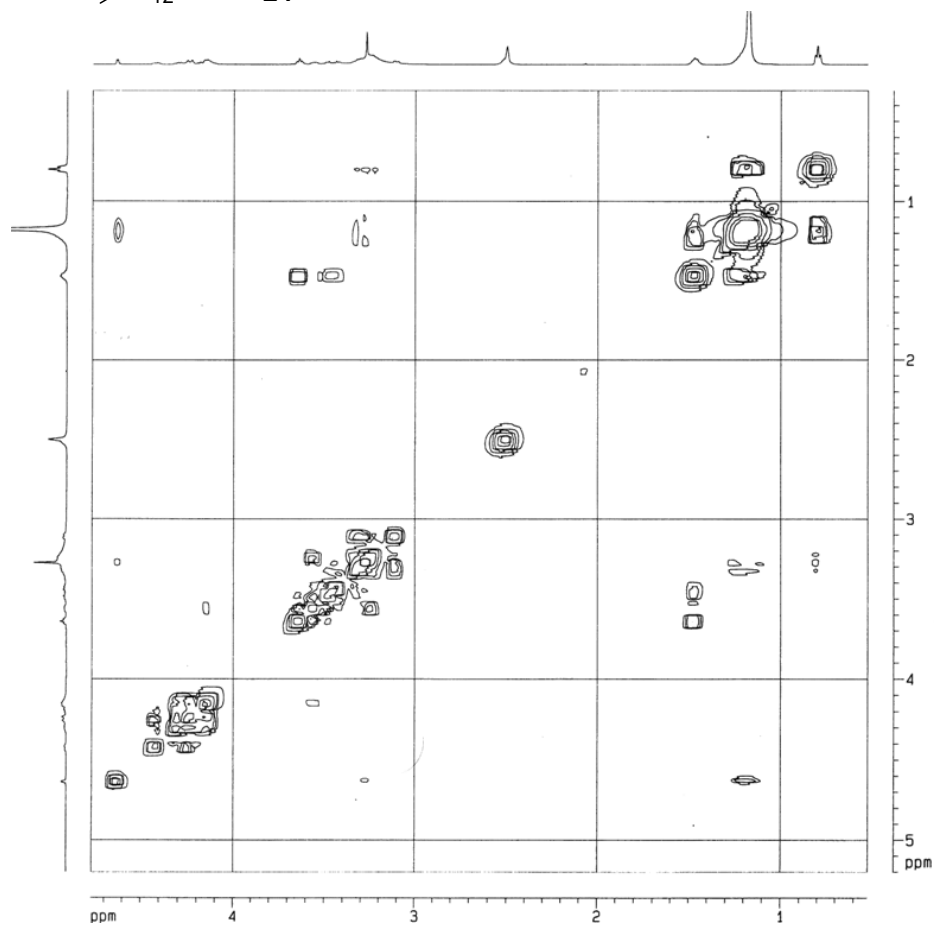

$\text{CDCl}_3:(\text{CD}_3)_2\text{SO}$  (4:2) 500 MHz
